# Supplementary material for: Cellulose Isolation from Tomato Pomace Pretreated by High-Pressure Homogenization
Source: MDPI journal article supplement (doi:10.3390/foods11030266), 2022-01-19
Supplement: s1 [file s1]

# Cellulose Isolation from Tomato Pomace Pretreated by High-Pressure Homogenization

Annachiara Pirozzi <sup>1</sup>, Giovanna Ferrari <sup>1,2</sup> and Francesco Donsì <sup>1,\*</sup>

<sup>1</sup> Department of Industrial Engineering, University of Salerno, Via Giovanni Paolo II, 132, 84084 Fisciano, SA, Italy; apirozzi@unisa.it (A.P.); gferrari@unisa.it (G.F.)

<sup>2</sup> ProdAl Scarl, University of Salerno, Via Giovanni Paolo II, 132, 84084 Fisciano, SA, Italy

\* Correspondence: fdonsi@unisa.it

## S1. I-optimal design

Response surface methodology (RSM) with I-Optimal Design was used for experiment planning and data processing. We have used an I-optimal design, as it minimizes the average prediction variance across the design space [1,2]. A second-order regression model for response surface design takes the following form:

$$Y_1 = \beta_0 + \sum_j \beta_j X_j + \sum_{i < j} \beta_{ij} X_i X_j + \varepsilon \quad (1)$$

In this equation, the values of the total phenols, used as the response variable ( $Y_1$ ), were related to the experimental factors ( $X_{i,j}$  with  $i, j = 1, 2$ ). The coefficients of the polynomial model correspond to a constant term ( $\beta_0$ ), linear effects ( $\beta_i$ ), and pure second-order interaction effects ( $\beta_{ij}$ ), with  $\varepsilon$  being the model error.

The significant terms of the model were determined through analysis of variance (ANOVA) for the response variable of a duplicate, carried out through the Design-Expert 11.1.2.0 software. The adequacy of the model was assessed determining the determination coefficients ( $R^2$ , Adj- $R^2$ ), and probability values (p-value).

## S2. Optimization of conventional extraction

The experimental data in Figure S1 were fitted to the multilinear regression model in Equation 1, considering both the first order and second order terms, as well as the interaction effects. This graph is useful to understand the correlation between the input parameters and response variable and to enable the prediction of the optimum values of the independent variables (type of solvent and solvent concentration) that maximize the response variable (total phenols).

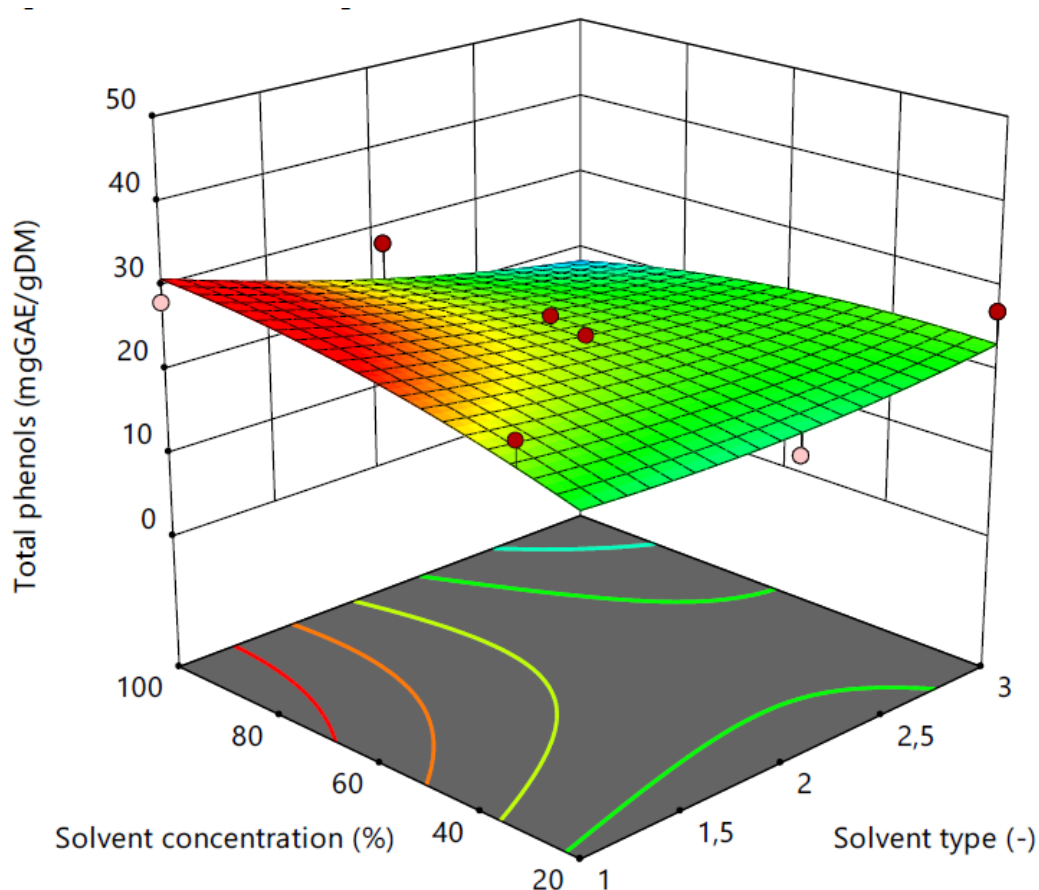

**Figure S1.** 3D Response surface plot presenting the synergistic effects of factors: solvent concentration and type of solvent on total phenols.

Figure S1 explicitly reports the strong dependence of total phenols from the solvent concentration and solvent type. The total phenols decrease with the increase of solvent polarity (i.e. solvent type). Therefore, the more affine solvent, which allows maximizing the total phenols extraction, is acetone (solvent #1). In addition, the optimum concentration of acetone ranged between 70 and 100% v/v.

**Table S1.** ANOVA results for quadratic model fitted to total phenols extraction.

| Source                  | Coefficient | p-value |
|-------------------------|-------------|---------|
| $\beta_0$               | 19.198      | 0.0435  |
| $\beta_1$               | -2.554      | 0.0167  |
| $\beta_2$               | 0.326       | 0.0419  |
| $\beta_{12}$            | -0.087      | 0.0159  |
| $\beta_{11}$            | 1.222       | 0.0392  |
| $\beta_{22}$            | -0.001      | 0.0545  |
| <b>Model diagnostic</b> |             |         |
| R <sup>2</sup>          | 0.654       |         |
| Adj-R <sup>2</sup>      | 0.575       |         |

The statistical analysis confirms that both independent variables X1 and X2 (type of solvent and solvent concentration, respectively) exhibited a significant effect on total phenols (Y1) extraction, with both coefficients ( $\beta_1$  and  $\beta_2$ ) characterized by a p-value < 0.05. In addition, also the interaction coefficient resulted to have a significant effect

on the re-35 sponse variable ( $p < 0.05$ ). Finally, the values obtained for R2 and Adj-R2 (0.654 and 0.575, 36 respectively) suggest that the regression model was suitable to describe the observed ex-37 perimental data.

### S3. Biological properties of liquors

The reducing activity of TP and HPH-TP extracted with optimized solvent (acetone 40 at 80% v/v under agitation at 180 rpm at 25°C for 24 h) has been reported in the following 41 table (Table S2) within the reducing activity of liquors out coming from hydrolysis steps. 42 The drying processes, air drying at 50 °C for TP and freeze-drying for HPH pre-treated TP, 43 do not affect the reducing activity. Therefore, the initial TPC and FRAP values are not 44 significant ( $p < 0.05$ ) different and the change in biological activity of the liquors do not 45 depends on drying process of the raw materials (TP and HPH-TP) used for the mild se-46 quential chemical hydrolysis.

**Table S2.** Reducing activity of TP and HPH-TP liquors coming from solvent extraction and hydrolysis steps.

|                     | TP                | HPH-TP            |
|---------------------|-------------------|-------------------|
| Solvent extraction  | $0.29 \pm 0.01^d$ | $0.30 \pm 0.01^d$ |
| Acid hydrolysis     | $0.56 \pm 0.02^e$ | $0.58 \pm 0.01^e$ |
| Alkaline hydrolysis | $0.10 \pm 0.01^b$ | $0.20 \pm 0.02^c$ |
| Bleaching           | $0.04 \pm 0.01^a$ | $0.05 \pm 0.01^a$ |

Different letters denote statistically significant ( $p < 0.05$ ) differences.

### References

1. Sambo F; Borrotti M; Mylona K A Coordinate-Exchange Two-Phase Local Search Algorithm for the D- and I-Optimal Designs 53 of Split-Plot Experiments. *Comput. Stat. Data Anal* **2014**, *71*, 1193–1207, doi:10.1016/j.csda.2013.03.015 54
2. Myers Raymond H., Montgomery Douglas C., A.-C. CM Response Surface Methodology: Process and Product Optimization 55 Using Designed Experiments; Edition, 4th, Ed.; Wiley: New York, **2016** .
